# Supplementary material for: Aconitine Neurotoxicity According to Administration Methods
Source: MDPI journal article supplement (doi:10.3390/jcm10102149), 2021-05-16
Supplement: s1 [file s1]

# CERTIFICATE OF ENGLISH EDITING

This document certifies that the paper listed below has been edited to ensure that the language is clear and free of errors. The edit was performed by professional editors at Editage, a division of Cactus Communications. The intent of the author's message was not altered in any way during the editing process. The quality of the edit has been guaranteed, with the assumption that our suggested changes have been accepted and have not been further altered without the knowledge of our editors.

## TITLE OF THE PAPER

Physiological mechanism of aconitine neurotoxicity in humans

## AUTHORS

Hyun Goo Kang

## JOB CODE

JBNUJ\_338

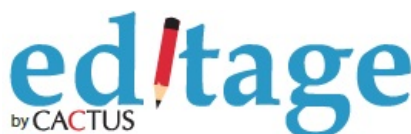

Signature

Vikas Narang

Vikas Narang,  
Chief Operating Officer,  
Editage

Date of Issue  
**January 27, 2021**

Editage, a brand of Cactus Communications, offers professional English language editing and publication support services to authors engaged in over 500 areas of research. Through its community of experienced editors, which includes doctors, engineers, published scientists, and researchers with peer review experience, Editage has successfully helped authors get published in internationally reputed journals. Authors who work with Editage are guaranteed excellent language quality and timely delivery.

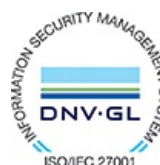

CACTUS

### Contact Editage

Worldwide  
request@editage.com  
+1(833)979-0061  
www.editage.com

Japan  
submissions@editage.com  
+81 0120-50-2987  
www.editage.jp

Korea  
submit-  
korea@editage.com  
02-3478-4396  
www.editage.co.kr

China  
fabiao@editage.cn  
400-005-6055  
www.editage.cn

Brazil  
contato@editage.com  
+5508000474773  
www.editage.com.br

Taiwan  
submitjobs@editage.com  
02 2657 0306  
www.editage.com.tw
